# Supplementary material for: Tracing the path of 37,050 studies into practice across 18 specialties of the 2.4 million published between 2011 and 2020
Source: eLife. 2023 Feb 28;12:e82498. doi: 10.7554/eLife.82498 (PMC10115455; doi:10.7554/eLife.82498)
Supplement: Supplementary file 1. [file elife-82498-supp1.docx]

| **Specialty** | **Journal** | **Median Years to Citation** | **Fraction of Articles Cited** | **5-Year Impact Factor** |
| --- | --- | --- | --- | --- |
| **anesthesiology** | Br J Anaesth | 3 | 0.009 | 9.097 |
| Anesthesiology | 5 | 0.011 | 8.139 |
| Anaesthesia | 3 | 0.005 | 6.211 |
| Reg Anesth Pain Med | 4 | 0.017 | 6.077 |
| Eur J Anaesthesiol | 2 | 0.005 | 4.941 |
| Anesth Analg | 3 | 0.013 | 4.935 |
| Can J Anaesth | 4 | 0.009 | 4.362 |
| J Clin Anesth | 4 | 0.006 | 4.067 |
| Best Pract Res Clin Anaesthesiol | 5 | 0.01 | 3.397 |
| Curr Opin Anaesthesiol | 1 | 0.015 | 2.824 |
| BMC Anesthesiol | 4 | 0.023 | 2.477 |
| Acta Anaesthesiol Scand | 2.5 | 0.007 | 2.469 |
| J Anesth | 1 | 0.005 | 1.975 |
| Rev Bras Anestesiol | 7.5 | 0.01 | 1.183 |
| Anaesthesist | 2 | 0.004 | 1.094 |
| **cardiac & cardiovascular systems** | Eur Heart J | 1 | 0.022 | 29.729 |
| Nat Rev Cardiol | 1 | 0.015 | 27 |
| J Am Coll Cardiol | 2 | 0.044 | 22.758 |
| Eur J Heart Fail | 3 | 0.012 | 12.768 |
| JACC Heart Fail | 1 | 0.047 | 11.282 |
| JACC Cardiovasc Interv | 1 | 0.035 | 10.731 |
| J Am Soc Echocardiogr | 2 | 0.019 | 9.01 |
| Cardiovasc Res | 15 | 0.002 | 8.861 |
| Circ Heart Fail | 2 | 0.04 | 8.509 |
| Prog Cardiovasc Dis | 5.5 | 0.009 | 7.107 |
| Circ Cardiovasc Interv | 1.5 | 0.032 | 6.891 |
| Circ Arrhythm Electrophysiol | 1 | 0.047 | 6.6 |
| Eur J Prev Cardiol | 1 | 0.01 | 6.361 |
| Heart | 2 | 0.014 | 6.308 |
| Heart Rhythm | 1 | 0.037 | 6.209 |
| Circ Cardiovasc Qual Outcomes | 1 | 0.034 | 6.168 |
| J Am Heart Assoc | 1 | 0.023 | 6.155 |
| Curr Probl Cardiol | 1 | 0.077 | 5.492 |
| Europace | 1 | 0.018 | 5.274 |
| Can J Cardiol | 3 | 0.009 | 5.226 |
| J Card Fail | 5 | 0.024 | 5.208 |
| Heart Fail Rev | 1 | 0.022 | 5.201 |
| Clin Res Cardiol | 6 | 0.008 | 4.901 |
| Rev Esp Cardiol | 10 | 0.006 | 4.831 |
| Am Heart J | 5 | 0.006 | 4.569 |
| EuroIntervention | 1.5 | 0.005 | 4.439 |
| Int J Cardiol | 2 | 0.004 | 4.24 |
| ESC Heart Fail | 2 | 0.03 | 4.072 |
| Glob Heart | 1 | 0.019 | 4.028 |
| Eur Heart J Acute Cardiovasc Care | 0 | 0.021 | 3.702 |
| Circ J | 3 | 0.006 | 3.152 |
| Am J Cardiol | 3 | 0.011 | 3.133 |
| Arch Cardiovasc Dis | 1 | 0.007 | 3.093 |
| Curr Cardiol Rep | 2 | 0.005 | 2.966 |
| Clin Cardiol | 7 | 0.005 | 2.88 |
| J Cardiol | 0 | 0.004 | 2.742 |
| Heart Lung Circ | 1 | 0.006 | 2.682 |
| Curr Opin Cardiol | 2 | 0.011 | 2.628 |
| BMC Cardiovasc Disord | 4 | 0.006 | 2.613 |
| Cardiovasc Ultrasound | 4 | 0.007 | 2.574 |
| Heart Fail Clin | 1.5 | 0.011 | 2.508 |
| Cardiol Clin | 2.5 | 0.009 | 2.481 |
| Catheter Cardiovasc Interv | 3 | 0.007 | 2.461 |
| Cardiol Rev | 7.5 | 0.025 | 2.44 |
| Arq Bras Cardiol | 6 | 0.001 | 2.415 |
| Korean Circ J | 4 | 0.005 | 2.263 |
| Congenit Heart Dis | 2 | 0.014 | 2.259 |
| Semin Thorac Cardiovasc Surg | 6 | 0.003 | 2.251 |
| Kardiol Pol | 3.5 | 0.003 | 2.234 |
| J Cardiopulm Rehabil Prev | 1 | 0.034 | 2.138 |
| J Interv Cardiol | 7 | 0.012 | 2.093 |
| Cardiology | 5 | 0.006 | 1.998 |
| Cardiol J | 2 | 0.01 | 1.977 |
| J Interv Card Electrophysiol | 3.5 | 0.008 | 1.96 |
| Cardiol Res Pract | 1 | 0.01 | 1.906 |
| Cardiovasc J Afr | 3 | 0.006 | 1.879 |
| Int Heart J | 1 | 0.007 | 1.731 |
| J Invasive Cardiol | 3 | 0.004 | 1.704 |
| Scand Cardiovasc J | 7.5 | 0.003 | 1.654 |
| Echocardiography | 2 | 0.006 | 1.647 |
| Coron Artery Dis | 6.5 | 0.008 | 1.637 |
| Ann Noninvasive Electrocardiol | 4 | 0.007 | 1.49 |
| J Electrocardiol | 3.5 | 0.008 | 1.47 |
| Acta Cardiol | 3.5 | 0.003 | 1.313 |
| Tex Heart Inst J | 2 | 0.005 | 1.296 |
| Herz | 2 | 0.004 | 1.124 |
| Rev Port Cardiol | 3 | 0.002 | 1.061 |
| Minerva Cardioangiol | 16 | 0.016 | 0.887 |
| **clinical neurology** | Lancet Neurol | 1 | 0.091 | 41.51 |
| Nat Rev Neurol | 1 | 0.017 | 35.2 |
| Alzheimers Dement | 1 | 0.016 | 19.962 |
| JAMA Neurol | 0 | 0.153 | 16.074 |
| Neurology | 1 | 0.033 | 10.663 |
| Mov Disord | 1 | 0.02 | 10.414 |
| Epilepsy Curr | 0.5 | 0.004 | 8.772 |
| Epilepsia | 1 | 0.023 | 7.12 |
| Sleep Health | 0 | 0.02 | 6.655 |
| Ther Adv Neurol Disord | 3 | 0.05 | 6 |
| Parkinsonism Relat Disord | 3 | 0.006 | 5.368 |
| J Clin Sleep Med | 1 | 0.049 | 5.255 |
| J Neurol | 4 | 0.008 | 5.02 |
| Headache | 5 | 0.016 | 4.933 |
| Sleep Med | 1 | 0.021 | 4.609 |
| Mult Scler Relat Disord | 0 | 0.011 | 4.292 |
| Amyotroph Lateral Scler Frontotemporal Degener | 2 | 0.011 | 4.131 |
| J Clin Neurol | 3 | 0.006 | 4.089 |
| Curr Pain Headache Rep | 5 | 0.022 | 3.731 |
| Curr Treat Options Neurol | 1 | 0.019 | 3.617 |
| J Pain Res | 1 | 0.018 | 3.507 |
| Child Neuropsychol | 2.5 | 0.01 | 3.418 |
| Behav Neurol | 1 | 0.016 | 3.29 |
| Acta Neurol Scand | 4 | 0.004 | 3.283 |
| Semin Neurol | 5 | 0.009 | 3.212 |
| Epilepsy Res | 1.5 | 0.005 | 3.143 |
| BMC Neurol | 2 | 0.008 | 2.993 |
| Pain Res Manag | 4 | 0.02 | 2.987 |
| Neurologia | 1.5 | 0.002 | 2.882 |
| Can J Neurol Sci | 3 | 0.005 | 2.661 |
| Korean J Pain | 1 | 0.027 | 2.538 |
| Epileptic Disord | 2 | 0.01 | 2.352 |
| Ann Indian Acad Neurol | 0 | 0.007 | 1.626 |
| Neurol Neurochir Pol | 1 | 0.013 | 1.386 |
| Neurologist | 3 | 0.028 | 1.155 |
| Rev Neurol | 9 | 0.001 | 0.756 |
| Intensive Care Med | 2 | 0.017 | 19.18 |
| Crit Care Med | 2 | 0.02 | 8.416 |
| Ann Intensive Care | 4 | 0.016 | 6.068 |
| Crit Care Clin | 6 | 0.01 | 4.047 |
| J Crit Care | 1 | 0.018 | 3.759 |
| Curr Opin Crit Care | 4 | 0.009 | 3.642 |
| J Intensive Care Med | 2 | 0.035 | 3.257 |
| Crit Care Resusc | 2 | 0.023 | 2.361 |
| Med Intensiva | 2 | 0.008 | 2.302 |
| Ther Hypothermia Temp Manag | 1 | 0.054 | 1.474 |
| **dermatology** | JAMA Dermatol | 1 | 0.102 | 10.725 |
| J Am Acad Dermatol | 1 | 0.029 | 10.238 |
| J Invest Dermatol | 1.5 | 0.006 | 8.452 |
| Br J Dermatol | 1 | 0.018 | 8.407 |
| Am J Clin Dermatol | 2 | 0.026 | 6.39 |
| J Eur Acad Dermatol Venereol | 1 | 0.02 | 5.977 |
| J Dermatol Sci | 1 | 0.006 | 5.052 |
| J Dtsch Dermatol Ges | 3 | 0.012 | 4.796 |
| Acta Derm Venereol | 4.5 | 0.007 | 4.379 |
| Dermatol Clin | 2 | 0.011 | 4.246 |
| Dermatitis | 1.5 | 0.017 | 3.943 |
| Dermatology | 4 | 0.014 | 3.888 |
| Eur J Dermatol | 4 | 0.011 | 3.778 |
| J Dermatol | 2 | 0.007 | 3.626 |
| Exp Dermatol | 3 | 0.006 | 3.489 |
| Clin Dermatol | 2 | 0.01 | 3.392 |
| Indian J Dermatol Venereol Leprol | 2 | 0.005 | 3.251 |
| Photodermatol Photoimmunol Photomed | 5.5 | 0.014 | 3.162 |
| J Dermatolog Treat | 1 | 0.016 | 3.062 |
| Dermatol Ther | 1 | 0.019 | 2.912 |
| J Cosmet Dermatol | 4 | 0.008 | 2.89 |
| Clin Exp Dermatol | 4.5 | 0.009 | 2.661 |
| J Wound Care | 3 | 0.003 | 2.63 |
| Int J Dermatol | 3 | 0.007 | 2.48 |
| Australas J Dermatol | 3.5 | 0.008 | 2.306 |
| Indian J Dermatol | 2 | 0.006 | 2.195 |
| Ann Dermatol | 2.5 | 0.012 | 2.095 |
| An Bras Dermatol | 2.5 | 0.009 | 2.057 |
| J Cutan Med Surg | 4 | 0.011 | 2.029 |
| J Drugs Dermatol | 2 | 0.017 | 1.92 |
| G Ital Dermatol Venereol | 2 | 0.008 | 1.671 |
| Am J Dermatopathol | 1 | 0.008 | 1.435 |
| Acta Dermatovenerol Croat | 6 | 0.014 | 1.429 |
| Ann Dermatol Venereol | 2 | 0.002 | 0.82 |
| Hautarzt | 10.5 | 0.001 | 0.699 |
| **emergency medicine** | Ann Emerg Med | 1 | 0.02 | 6.107 |
| Acad Emerg Med | 2 | 0.019 | 3.891 |
| Scand J Trauma Resusc Emerg Med | 1 | 0.009 | 3.263 |
| Emerg Med J | 3 | 0.009 | 3.135 |
| Eur J Trauma Emerg Surg | 1 | 0.016 | 3.088 |
| West J Emerg Med | 2 | 0.014 | 2.788 |
| BMC Emerg Med | 3 | 0.058 | 2.54 |
| Emerg Med Clin North Am | 2.5 | 0.011 | 2.346 |
| CJEM | 1 | 0.014 | 2.257 |
| Eur J Emerg Med | 6 | 0.005 | 2.155 |
| Am J Emerg Med | 2 | 0.01 | 2.101 |
| Emerg Med Australas | 4.5 | 0.01 | 2.064 |
| World J Emerg Med | 5 | 0.018 | 2.04 |
| Prehosp Disaster Med | 0.5 | 0.006 | 1.928 |
| J Emerg Med | 1 | 0.013 | 1.584 |
| **endocrinology & metabolism** | Nat Rev Endocrinol | 1 | 0.047 | 36.757 |
| Lancet Diabetes Endocrinol | 1 | 0.041 | 29.79 |
| Endocr Rev | 5 | 0.035 | 24.715 |
| Diabetes Care | 2 | 0.021 | 17.067 |
| Trends Endocrinol Metab | 1.5 | 0.009 | 13.851 |
| Obes Rev | 3 | 0.009 | 12.125 |
| Diabetologia | 4 | 0.005 | 9.097 |
| Diabetes | 8 | 0.004 | 9.091 |
| Thyroid | 1 | 0.032 | 9.034 |
| Rev Endocr Metab Disord | 1 | 0.023 | 8.264 |
| Metabolism | 3 | 0.003 | 7.867 |
| Mol Metab | 1 | 0.009 | 7.864 |
| World J Diabetes | 1 | 0.007 | 7.348 |
| J Bone Miner Res | 2 | 0.02 | 6.893 |
| J Clin Endocrinol Metab | 3 | 0.027 | 6.792 |
| Diabetes Obes Metab | 2 | 0.022 | 6.587 |
| Eur J Endocrinol | 2 | 0.023 | 6.341 |
| Curr Osteoporos Rep | 2 | 0.019 | 6.064 |
| Diabetes Metab Res Rev | 3 | 0.008 | 5.324 |
| Best Pract Res Clin Endocrinol Metab | 4 | 0.026 | 5.26 |
| Curr Diab Rep | 1 | 0.01 | 5.221 |
| Bone | 5 | 0.008 | 5.175 |
| J Endocrinol | 5 | 0.003 | 4.971 |
| Diabetes Metab | 7 | 0.007 | 4.931 |
| Diabetes Res Clin Pract | 2 | 0.004 | 4.876 |
| Diabetes Metab J | 1 | 0.014 | 4.865 |
| Endocrinology | 6.5 | 0.001 | 4.809 |
| Osteoporos Int | 1 | 0.011 | 4.802 |
| Endocrinol Metab Clin North Am | 5.5 | 0.015 | 4.755 |
| J Mol Endocrinol | 2 | 0.007 | 4.755 |
| Diabetes Technol Ther | 2 | 0.01 | 4.699 |
| Curr Opin Endocrinol Diabetes Obes | 1 | 0.016 | 4.538 |
| Calcif Tissue Int | 4.5 | 0.003 | 4.306 |
| Diabet Med | 3 | 0.009 | 4.288 |
| Endocr Pract | 3 | 0.013 | 4.205 |
| Pituitary | 1 | 0.02 | 4.167 |
| BMJ Open Diabetes Res Care | 1.5 | 0.013 | 3.98 |
| J Endocrinol Invest | 5.5 | 0.005 | 3.881 |
| J Diabetes | 4 | 0.024 | 3.853 |
| Acta Diabetol | 2 | 0.004 | 3.77 |
| Endocrine | 1 | 0.007 | 3.613 |
| Diabetes Metab Syndr Obes | 3 | 0.02 | 3.602 |
| Diabetol Metab Syndr | 2 | 0.007 | 3.426 |
| J Diabetes Complications | 1.5 | 0.006 | 3.378 |
| Diabetes Ther | 1 | 0.019 | 3.261 |
| Int J Endocrinol | 3 | 0.004 | 3.167 |
| J Clin Densitom | 1 | 0.013 | 3.165 |
| Arch Endocrinol Metab | 1 | 0.013 | 3.105 |
| BMC Endocr Disord | 4 | 0.017 | 2.879 |
| Horm Metab Res | 1 | 0.003 | 2.772 |
| Endocr J | 1 | 0.006 | 2.404 |
| Exp Clin Endocrinol Diabetes | 9 | 0.008 | 2.376 |
| Minerva Endocrinol | 3 | 0.006 | 1.924 |
| Endocr Res | 8.5 | 0.009 | 1.876 |
| **gastroenterology & hepatology** | Nat Rev Gastroenterol Hepatol | 2 | 0.024 | 38.143 |
| Gastroenterology | 2 | 0.024 | 23.936 |
| Gut | 2 | 0.018 | 22.223 |
| J Hepatol | 1 | 0.022 | 20.888 |
| Hepatology | 1 | 0.023 | 16.555 |
| Am J Gastroenterol | 2 | 0.024 | 12.591 |
| Clin Gastroenterol Hepatol | 1 | 0.074 | 10.03 |
| J Crohns Colitis | 2 | 0.018 | 9.485 |
| Gastrointest Endosc | 1 | 0.028 | 8.955 |
| Cell Mol Gastroenterol Hepatol | 2 | 0.042 | 8.69 |
| J Gastroenterol | 3 | 0.007 | 6.769 |
| Clin Liver Dis | 2 | 0.038 | 6.603 |
| Semin Liver Dis | 3 | 0.018 | 6.503 |
| Hepatol Int | 1 | 0.008 | 5.975 |
| Clin Transl Gastroenterol | 1 | 0.021 | 5.551 |
| Inflamm Bowel Dis | 2 | 0.024 | 5.328 |
| Liver Int | 3 | 0.012 | 5.276 |
| World J Gastroenterol | 3 | 0.007 | 5.044 |
| Gastroenterol Clin North Am | 6 | 0.009 | 4.805 |
| Clin Mol Hepatol | 2 | 0.02 | 4.793 |
| United European Gastroenterol J | 0 | 0.006 | 4.687 |
| J Clin Transl Hepatol | 1 | 0.024 | 4.608 |
| Best Pract Res Clin Gastroenterol | 8 | 0.007 | 4.438 |
| Therap Adv Gastroenterol | 1.5 | 0.032 | 4.333 |
| Pancreatology | 1.5 | 0.008 | 4.262 |
| J Gastroenterol Hepatol | 3 | 0.008 | 4.144 |
| Curr Opin Gastroenterol | 3 | 0.011 | 3.997 |
| Gut Liver | 1 | 0.012 | 3.989 |
| Dig Liver Dis | 2 | 0.009 | 3.947 |
| Endosc Ultrasound | 1 | 0.009 | 3.84 |
| Expert Rev Gastroenterol Hepatol | 2 | 0.015 | 3.785 |
| Hepatol Res | 2 | 0.006 | 3.651 |
| BMC Gastroenterol | 2 | 0.018 | 3.441 |
| Pancreas | 1 | 0.012 | 3.417 |
| Dig Dis Sci | 2 | 0.011 | 3.392 |
| Dis Esophagus | 1 | 0.021 | 3.343 |
| J Clin Gastroenterol | 2.5 | 0.009 | 3.308 |
| Can J Gastroenterol Hepatol | 1.5 | 0.007 | 3.149 |
| Dig Dis | 2 | 0.005 | 3.098 |
| Digestion | 2 | 0.006 | 3.062 |
| Clin Res Hepatol Gastroenterol | 1 | 0.005 | 2.954 |
| Scand J Gastroenterol | 4 | 0.009 | 2.801 |
| Eur J Gastroenterol Hepatol | 4 | 0.009 | 2.613 |
| Saudi J Gastroenterol | 1 | 0.007 | 2.46 |
| Ann Hepatol | 3 | 0.011 | 2.449 |
| Rev Esp Enferm Dig | 1 | 0.003 | 2.328 |
| Gastroenterol Res Pract | 2 | 0.008 | 2.279 |
| J Gastrointestin Liver Dis | 2 | 0.01 | 2.258 |
| J Dig Dis | 1.5 | 0.012 | 2.174 |
| Minerva Gastroenterol Dietol | 8 | 0.024 | 2.111 |
| Z Gastroenterol | 3 | 0.009 | 1.759 |
| Gastroenterol Hepatol | 7 | 0.007 | 1.738 |
| Turk J Gastroenterol | 4.5 | 0.002 | 1.707 |
| Arab J Gastroenterol | 3 | 0.017 | 1.541 |
| Hepat Mon | 1 | 0.004 | 1.409 |
| Acta Gastroenterol Belg | 5 | 0.013 | 1.022 |
| **geriatrics & gerontology** | Age Ageing | 3.5 | 0.008 | 8.222 |
| J Am Med Dir Assoc | 4 | 0.009 | 6.462 |
| Gerontology | 6 | 0.004 | 5.685 |
| Biogerontology | 2 | 0.015 | 5.252 |
| Clin Interv Aging | 1.5 | 0.006 | 4.744 |
| Rejuvenation Res | 3 | 0.012 | 4.342 |
| Exp Gerontol | 5 | 0.002 | 4.297 |
| Arch Gerontol Geriatr | 3.5 | 0.005 | 3.734 |
| Clin Geriatr Med | 3 | 0.067 | 3.472 |
| Aging Clin Exp Res | 8 | 0.003 | 3.428 |
| **hematology** | Blood | 1 | 0.034 | 19.676 |
| Lancet Haematol | 1 | 0.082 | 16.564 |
| Haematologica | 2 | 0.022 | 9.754 |
| Am J Hematol | 1 | 0.029 | 7.954 |
| Blood Rev | 3.5 | 0.042 | 7.773 |
| Blood Adv | 0 | 0.004 | 6.795 |
| Br J Haematol | 1 | 0.019 | 6.455 |
| Transfus Med Rev | 2 | 0.026 | 5.063 |
| Semin Hematol | 6 | 0.009 | 4.132 |
| Haemophilia | 2.5 | 0.014 | 4.011 |
| Curr Opin Hematol | 1 | 0.019 | 3.74 |
| Ann Hematol | 2 | 0.011 | 3.541 |
| Blood Transfus | 2.5 | 0.01 | 3.47 |
| Transfusion | 1 | 0.017 | 3.178 |
| Int J Lab Hematol | 1 | 0.017 | 2.921 |
| Eur J Haematol | 2 | 0.009 | 2.817 |
| Best Pract Res Clin Haematol | 5 | 0.01 | 2.808 |
| Expert Rev Hematol | 3 | 0.022 | 2.777 |
| J Clin Apher | 3.5 | 0.015 | 2.675 |
| Blood Cells Mol Dis | 1 | 0.013 | 2.508 |
| Int J Hematol | 4 | 0.003 | 2.378 |
| Vox Sang | 3.5 | 0.004 | 2.181 |
| Transfus Med | 6 | 0.008 | 2.059 |
| Hematology | 2 | 0.005 | 2.033 |
| Transfus Apher Sci | 1 | 0.007 | 1.781 |
| Acta Haematol | 3 | 0.005 | 1.767 |
| Hamostaseologie | 2 | 0.011 | 1.495 |
| Blood Coagul Fibrinolysis | 4.5 | 0.007 | 1.328 |
| **infectious diseases** | Lancet Infect Dis | 1 | 0.07 | 25.023 |
| Euro Surveill | 1 | 0.012 | 6.015 |
| J Infect | 3 | 0.013 | 5.427 |
| Infect Dis Ther | 0 | 0.026 | 4.798 |
| Curr Opin Infect Dis | 2 | 0.026 | 4.729 |
| Int J Infect Dis | 4 | 0.014 | 4.01 |
| Sex Transm Infect | 2.5 | 0.009 | 3.783 |
| Infection | 2 | 0.008 | 3.489 |
| BMC Infect Dis | 1 | 0.012 | 3.401 |
| Curr Infect Dis Rep | 1 | 0.009 | 3.388 |
| HIV Med | 3 | 0.014 | 3.317 |
| Infect Genet Evol | 2 | 0.003 | 3.188 |
| AIDS Res Ther | 2 | 0.01 | 2.782 |
| Sex Transm Dis | 3 | 0.012 | 2.692 |
| Braz J Infect Dis | 3.5 | 0.004 | 2.347 |
| Med Mal Infect | 1 | 0.004 | 1.858 |
| J Infect Dev Ctries | 3 | 0.005 | 1.484 |
| Jpn J Infect Dis | 5 | 0.004 | 1.297 |
| Rev Chilena Infectol | 4 | 0.003 | 0.585 |
| **medicine, general & internal** | N Engl J Med | 1 | 0.038 | 89.666 |
| Lancet | 1 | 0.011 | 77.237 |
| JAMA | 1 | 0.021 | 60.145 |
| BMJ | 1 | 0.017 | 38.657 |
| Ann Intern Med | 1 | 0.03 | 25.267 |
| JAMA Intern Med | 0 | 0.122 | 23.067 |
| PLoS Med | 1 | 0.03 | 14.412 |
| BMC Med | 1 | 0.022 | 10.249 |
| CMAJ | 1 | 0.013 | 10.033 |
| Cochrane Database Syst Rev | 1 | 0.111 | 9.871 |
| Mayo Clin Proc | 2 | 0.022 | 9.422 |
| J Intern Med | 3 | 0.012 | 8.302 |
| Med J Aust | 4.5 | 0.001 | 6.905 |
| Dtsch Arztebl Int | 1 | 0.017 | 6.459 |
| Am J Med | 2 | 0.015 | 6.011 |
| Br Med Bull | 5 | 0.005 | 5.044 |
| Syst Rev | 2.5 | 0.013 | 5.038 |
| Med Clin North Am | 2 | 0.005 | 4.828 |
| J R Soc Med | 20 | 0.001 | 4.691 |
| Eur J Intern Med | 2 | 0.007 | 4.567 |
| J Clin Med | 1 | 0.021 | 4.566 |
| Ann Med | 3 | 0.003 | 4.554 |
| Int J Med Sci | 3 | 0.006 | 3.508 |
| QJM | 1 | 0.019 | 3.452 |
| BMJ Open | 1 | 0.007 | 3.424 |
| Panminerva Med | 11.5 | 0.021 | 3.352 |
| J Hosp Med | 1 | 0.02 | 3.299 |
| Mil Med Res | 0 | 0.027 | 3.285 |
| Arch Med Sci | 3 | 0.006 | 3.257 |
| Korean J Intern Med | 4 | 0.008 | 3.225 |
| Intern Emerg Med | 1 | 0.006 | 3.168 |
| J Formos Med Assoc | 2 | 0.003 | 3.16 |
| Ups J Med Sci | 4 | 0.008 | 3.08 |
| Postgrad Med | 3 | 0.004 | 2.852 |
| Postgrad Med J | 7 | 0.003 | 2.821 |
| Int J Clin Pract | 3.5 | 0.007 | 2.726 |
| Int J Gen Med | 4 | 0.008 | 2.724 |
| Am J Med Sci | 5 | 0.005 | 2.71 |
| J Korean Med Sci | 3 | 0.004 | 2.467 |
| J Chin Med Assoc | 5 | 0.003 | 2.452 |
| Yonsei Med J | 8 | 0.003 | 2.398 |
| Med Princ Pract | 0 | 0.009 | 2.388 |
| Cleve Clin J Med | 4 | 0.007 | 2.325 |
| Hong Kong Med J | 4 | 0.007 | 2.319 |
| Swiss Med Wkly | 5.5 | 0.007 | 2.296 |
| J Res Med Sci | 2 | 0.002 | 2.25 |
| Intern Med J | 1 | 0.009 | 2.089 |
| S Afr Med J | 6 | 0.001 | 2.068 |
| Singapore Med J | 3 | 0.002 | 2.053 |
| Saudi Med J | 9 | 0.002 | 2.051 |
| Ann Saudi Med | 5 | 0.01 | 2.044 |
| J Postgrad Med | 3.5 | 0.005 | 1.92 |
| Arch Iran Med | 2 | 0.014 | 1.777 |
| World J Clin Cases | 1 | 0.01 | 1.742 |
| Croat Med J | 6.5 | 0.006 | 1.696 |
| Rev Invest Clin | 7 | 0.018 | 1.696 |
| J Natl Med Assoc | 9.5 | 0.002 | 1.668 |
| Wien Klin Wochenschr | 5 | 0.003 | 1.635 |
| Neth J Med | 5.5 | 0.005 | 1.556 |
| Mil Med | 3 | 0.003 | 1.47 |
| Afr Health Sci | 5.5 | 0.005 | 1.442 |
| Ir J Med Sci | 1 | 0.003 | 1.441 |
| Sao Paulo Med J | 3 | 0.007 | 1.415 |
| Bratisl Lek Listy | 7.5 | 0.002 | 1.365 |
| Dan Med J | 1.5 | 0.007 | 1.357 |
| Pak J Med Sci | 0 | 0.003 | 1.276 |
| Rev Clin Esp | 1 | 0.01 | 1.221 |
| Intern Med | 3 | 0.006 | 1.22 |
| South Med J | 15 | 0.003 | 1.153 |
| Iran Red Crescent Med J | 2 | 0.004 | 1.152 |
| J Nippon Med Sch | 6.5 | 0.007 | 1.112 |
| Acta Clin Belg | 2 | 0.014 | 1.102 |
| Turk J Med Sci | 1 | 0.004 | 1.063 |
| Natl Med J India | 18 | 0.011 | 0.918 |
| Rev Med Interne | 4 | 0.003 | 0.909 |
| Scott Med J | 22 | 0.001 | 0.849 |
| JAAPA | 5 | 0.002 | 0.835 |
| Acta Clin Croat | 3 | 0.015 | 0.766 |
| J Coll Physicians Surg Pak | 2.5 | 0.006 | 0.735 |
| Rev Med Chil | 9 | 0.005 | 0.725 |
| Dtsch Med Wochenschr | 7 | 0 | 0.557 |
| Orv Hetil | 4.5 | 0.001 | 0.461 |
| West Indian Med J | 3 | 0.005 | 0.381 |
| Vojnosanit Pregl | 4 | 0.007 | 0.378 |
| Srp Arh Celok Lek | 2 | 0.007 | 0.358 |
| **oncology** | CA Cancer J Clin | 1 | 0.074 | 332.984 |
| Nat Rev Cancer | 2.5 | 0.009 | 68.839 |
| Nat Rev Clin Oncol | 1 | 0.029 | 52.441 |
| Lancet Oncol | 1 | 0.14 | 44.11 |
| Cancer Discov | 1 | 0.015 | 39.115 |
| J Clin Oncol | 1 | 0.071 | 33.883 |
| JAMA Oncol | 0 | 0.105 | 29.807 |
| Ann Oncol | 1 | 0.034 | 22.845 |
| Semin Cancer Biol | 2 | 0.008 | 14.564 |
| J Natl Cancer Inst | 1 | 0.016 | 13.893 |
| Cancer Res | 5 | 0.002 | 12.843 |
| Clin Cancer Res | 1 | 0.009 | 12.836 |
| Cancer Treat Rev | 2.5 | 0.016 | 11.143 |
| Cancer Metastasis Rev | 8 | 0.029 | 10.016 |
| J Exp Clin Cancer Res | 5 | 0.003 | 9.976 |
| J Natl Compr Canc Netw | 2 | 0.022 | 9.856 |
| Cancer Lett | 6 | 0 | 8.64 |
| Int J Cancer | 2 | 0.008 | 7.968 |
| Cancer | 2 | 0.012 | 7.921 |
| Br J Cancer | 1 | 0.008 | 7.57 |
| Breast Cancer Res | 4 | 0.007 | 7.426 |
| Mol Oncol | 8 | 0.04 | 7.405 |
| Mol Cancer Ther | 5 | 0.002 | 7.019 |
| Cancer Sci | 3.5 | 0.002 | 6.33 |
| Front Oncol | 4 | 0.003 | 6.264 |
| Am J Cancer Res | 4 | 0.024 | 5.863 |
| Semin Oncol | 3 | 0.002 | 5.47 |
| Carcinogenesis | 7 | 0.001 | 5.41 |
| Int J Oncol | 7 | 0 | 4.79 |
| Breast Cancer Res Treat | 2 | 0.005 | 4.698 |
| Curr Treat Options Oncol | 2 | 0.007 | 4.66 |
| Curr Oncol Rep | 1.5 | 0.027 | 4.617 |
| Cancer Med | 2 | 0.008 | 4.609 |
| Clin Colorectal Cancer | 1 | 0.036 | 4.538 |
| J Oncol | 3 | 0.009 | 4.499 |
| Clin Lung Cancer | 1 | 0.01 | 4.417 |
| BMC Cancer | 4 | 0.003 | 4.372 |
| Target Oncol | 2.5 | 0.029 | 4.369 |
| J Oncol Pract | 1.5 | 0.008 | 4.347 |
| Cancer Biol Ther | 4 | 0.002 | 4.342 |
| J Cancer | 3 | 0.004 | 4.277 |
| Acta Oncol | 3 | 0.005 | 4.236 |
| J Cancer Res Clin Oncol | 1 | 0.007 | 4.201 |
| Cancer J | 3 | 0.013 | 4.013 |
| Oncol Rep | 4 | 0.001 | 4.011 |
| Cancer Manag Res | 2.5 | 0.015 | 3.947 |
| Curr Opin Oncol | 3 | 0.009 | 3.705 |
| Expert Rev Anticancer Ther | 2 | 0.007 | 3.665 |
| Curr Probl Cancer | 5 | 0.048 | 3.615 |
| Photodiagnosis Photodyn Ther | 3 | 0.011 | 3.603 |
| Cancer Control | 4 | 0.011 | 3.429 |
| Clin Breast Cancer | 2 | 0.01 | 3.356 |
| Med Oncol | 1.5 | 0.004 | 3.304 |
| Int J Clin Oncol | 1 | 0.006 | 3.238 |
| Curr Oncol | 2 | 0.007 | 3.089 |
| Clin Transl Oncol | 5.5 | 0.003 | 3.057 |
| Future Oncol | 1.5 | 0.005 | 3.009 |
| Oncology | 3 | 0.011 | 3.006 |
| Jpn J Clin Oncol | 3 | 0.006 | 2.847 |
| Am J Clin Oncol | 1 | 0.013 | 2.831 |
| Eur J Cancer Prev | 3 | 0.006 | 2.83 |
| J Adolesc Young Adult Oncol | 2 | 0.048 | 2.796 |
| Asia Pac J Clin Oncol | 5 | 0.009 | 2.627 |
| Hered Cancer Clin Pract | 4 | 0.1 | 2.627 |
| Oncol Lett | 1 | 0.001 | 2.575 |
| Anticancer Res | 4 | 0.001 | 2.418 |
| Cancer Invest | 5 | 0.005 | 2.344 |
| Neoplasma | 5.5 | 0.002 | 2.337 |
| J BUON | 4 | 0.005 | 1.987 |
| Tumori | 11 | 0.002 | 1.722 |
| J Cancer Res Ther | 4 | 0.003 | 1.617 |
| Indian J Cancer | 13.5 | 0.018 | 1.306 |
| Bull Cancer | 3 | 0.006 | 1.025 |
| **pathology** | Annu Rev Pathol | 1 | 0.024 | 25.061 |
| Mod Pathol | 3 | 0.01 | 8.048 |
| J Mol Diagn | 1 | 0.014 | 6.343 |
| Am J Pathol | 8 | 0.002 | 5.138 |
| Pathology | 2 | 0.007 | 4.715 |
| Adv Anat Pathol | 1 | 0.014 | 4.46 |
| Expert Rev Mol Diagn | 1 | 0.017 | 4.419 |
| Virchows Arch | 2 | 0.006 | 3.619 |
| Hum Pathol | 5 | 0.006 | 3.456 |
| J Clin Pathol | 9 | 0.003 | 3.12 |
| Exp Mol Pathol | 3 | 0.005 | 2.935 |
| Am J Clin Pathol | 5 | 0.005 | 2.775 |
| Diagn Pathol | 2 | 0.005 | 2.759 |
| Pathol Res Pract | 3 | 0.001 | 2.74 |
| Pathol Int | 4 | 0.005 | 2.671 |
| Int J Exp Pathol | 7 | 0.016 | 2.447 |
| Acta Cytol | 12 | 0.004 | 2.324 |
| Ann Diagn Pathol | 17 | 0.003 | 2.276 |
| Cytojournal | 1 | 0.018 | 1.629 |
| Pol J Pathol | 6 | 0.013 | 1.074 |
| Indian J Pathol Microbiol | 4 | 0.001 | 0.815 |
| JAMA Pediatr | 0 | 0.13 | 16.709 |
| Pediatrics | 1 | 0.039 | 8.109 |
| Arch Dis Child Fetal Neonatal Ed | 1 | 0.046 | 5.191 |
| Semin Fetal Neonatal Med | 2 | 0.038 | 5.067 |
| J Pediatr | 1 | 0.024 | 5.042 |
| Pediatr Obes | 0 | 0.02 | 4.12 |
| Arch Dis Child | 1 | 0.011 | 3.96 |
| Acad Pediatr | 2 | 0.01 | 3.955 |
| Pediatr Res | 2 | 0.008 | 3.926 |
| Pediatr Clin North Am | 3 | 0.004 | 3.866 |
| Neonatology | 2 | 0.026 | 3.774 |
| Front Pediatr | 2 | 0.004 | 3.607 |
| Child Obes | 2.5 | 0.007 | 3.463 |
| Curr Opin Pediatr | 2 | 0.021 | 3.235 |
| Eur J Pediatr | 1 | 0.012 | 3.152 |
| BMC Pediatr | 1 | 0.016 | 2.782 |
| Ital J Pediatr | 2 | 0.015 | 2.672 |
| Paediatr Child Health | 5.5 | 0.005 | 2.483 |
| Pediatr Neonatol | 1.5 | 0.014 | 2.174 |
| Paediatr Int Child Health | 0 | 0.015 | 2.145 |
| J Paediatr Child Health | 4 | 0.009 | 2.137 |
| Arch Dis Child Educ Pract Ed | 1 | 0.016 | 2.005 |
| Indian J Pediatr | 4 | 0.001 | 1.868 |
| Indian Pediatr | 6 | 0.002 | 1.709 |
| Pediatr Int | 4 | 0.004 | 1.439 |
| Pediatr Ann | 3 | 0.008 | 1.404 |
| Minerva Pediatr | 2 | 0.014 | 1.198 |
| Klin Padiatr | 1.5 | 0.002 | 1.176 |
| Arch Argent Pediatr | 0 | 0.006 | 0.708 |
| Turk J Pediatr | 7 | 0.003 | 0.642 |
| **radiology, nuclear medicine & medical imaging** | Radiology | 3 | 0.011 | 10.389 |
| J Nucl Med | 5.5 | 0.003 | 8.573 |
| Eur J Nucl Med Mol Imaging | 4 | 0.007 | 8.391 |
| Radiographics | 2 | 0.02 | 7.269 |
| Clin Nucl Med | 7 | 0.003 | 6.918 |
| Invest Radiol | 9 | 0.001 | 5.958 |
| J Am Coll Radiol | 2 | 0.004 | 4.91 |
| Insights Imaging | 1 | 0.014 | 4.879 |
| Eur Radiol | 3 | 0.007 | 4.87 |
| J Magn Reson Imaging | 5 | 0.002 | 4.642 |
| Magn Reson Med | 3 | 0.003 | 4.616 |
| Semin Nucl Med | 5.5 | 0.008 | 4.392 |
| AJR Am J Roentgenol | 2 | 0.012 | 4.073 |
| Korean J Radiol | 4 | 0.01 | 3.947 |
| Med Phys | 2.5 | 0 | 3.767 |
| Eur J Radiol | 3 | 0.008 | 3.539 |
| Mol Imaging Biol | 3 | 0.008 | 3.389 |
| Diagn Interv Imaging | 1 | 0.008 | 3.206 |
| Br J Radiol | 4.5 | 0.003 | 3.016 |
| Acad Radiol | 3 | 0.007 | 2.751 |
| BMC Med Imaging | 2 | 0.023 | 2.683 |
| Radiol Med | 5 | 0.006 | 2.624 |
| Magn Reson Imaging | 3.5 | 0.001 | 2.608 |
| Clin Radiol | 6 | 0.006 | 2.597 |
| Diagn Interv Radiol | 1.5 | 0.016 | 2.591 |
| J Thorac Imaging | 9 | 0.01 | 2.463 |
| Magn Reson Imaging Clin N Am | 4 | 0.004 | 2.255 |
| Radiol Clin North Am | 4.5 | 0.007 | 2.172 |
| Rofo | 8 | 0.006 | 2.152 |
| Ann Nucl Med | 6 | 0.005 | 2.151 |
| Q J Nucl Med Mol Imaging | 1 | 0.017 | 2.109 |
| Semin Intervent Radiol | 2.5 | 0.013 | 2.083 |
| Acta Radiol | 3 | 0.004 | 1.92 |
| Semin Ultrasound CT MR | 3 | 0.011 | 1.884 |
| Can Assoc Radiol J | 10 | 0.003 | 1.869 |
| Jpn J Radiol | 3 | 0.008 | 1.857 |
| Semin Musculoskelet Radiol | 8 | 0.009 | 1.84 |
| J Med Imaging Radiat Oncol | 4 | 0.009 | 1.645 |
| Nucl Med Commun | 5 | 0.006 | 1.631 |
| J Comput Assist Tomogr | 4 | 0.003 | 1.592 |
| Clin Imaging | 3 | 0.004 | 1.481 |
| Ultrasound Q | 2 | 0.015 | 1.444 |
| Semin Roentgenol | 7 | 0.003 | 0.715 |
| Iran J Radiol | 1 | 0.011 | 0.534 |
| **urology & nephrology** | Nat Rev Nephrol | 2 | 0.044 | 26.996 |
| Eur Urol | 1 | 0.022 | 21.259 |
| Nat Rev Urol | 2 | 0.009 | 12.574 |
| J Am Soc Nephrol | 2 | 0.045 | 10.578 |
| Kidney Int | 2 | 0.021 | 10.558 |
| Clin J Am Soc Nephrol | 1 | 0.097 | 8.427 |
| Am J Kidney Dis | 3 | 0.032 | 8.418 |
| J Urol | 2 | 0.008 | 6.413 |
| BJU Int | 1.5 | 0.009 | 5.225 |
| Semin Nephrol | 4 | 0.014 | 5.061 |
| J Sex Med | 3 | 0.01 | 4.699 |
| Kidney Int Rep | 0 | 0.007 | 4.196 |
| Adv Chronic Kidney Dis | 4 | 0.018 | 4.134 |
| Clin Kidney J | 2 | 0.033 | 3.96 |
| Am J Nephrol | 4 | 0.01 | 3.953 |
| World J Urol | 2 | 0.006 | 3.874 |
| J Nephrol | 4 | 0.01 | 3.667 |
| J Endourol | 2 | 0.009 | 3.089 |
| Urolithiasis | 2 | 0.007 | 3.011 |
| Ther Adv Urol | 3 | 0.038 | 3.01 |
| Int J Urol | 0 | 0.006 | 2.986 |
| Neurourol Urodyn | 3 | 0.007 | 2.898 |
| BMC Nephrol | 3 | 0.01 | 2.879 |
| Curr Urol Rep | 2 | 0.01 | 2.763 |
| Semin Dial | 3 | 0.022 | 2.668 |
| Urol Clin North Am | 2 | 0.007 | 2.648 |
| Clin Exp Nephrol | 3 | 0.008 | 2.613 |
| Nephron | 22 | 0.004 | 2.586 |
| Nephron Clin Pract | 3.5 | 0.018 | 2.586 |
| Nephron Physiol | 5 | 0.019 | 2.586 |
| Urology | 1 | 0.008 | 2.564 |
| Int J Impot Res | 10 | 0.002 | 2.433 |
| BMC Urol | 3 | 0.009 | 2.399 |
| Ren Fail | 3 | 0.006 | 2.364 |
| Curr Opin Urol | 1 | 0.01 | 2.271 |
| Prostate Int | 1 | 0.033 | 2.248 |
| Nefrologia | 1 | 0.006 | 2.217 |
| Int Urol Nephrol | 2 | 0.004 | 2.199 |
| Perit Dial Int | 4 | 0.009 | 2.161 |
| Urol Int | 2 | 0.013 | 1.91 |
| Hemodial Int | 3 | 0.022 | 1.879 |
| Scand J Urol | 1 | 0.012 | 1.856 |
| Can Urol Assoc J | 3 | 0.004 | 1.729 |
| Urol J | 3 | 0.014 | 1.641 |
| Contrib Nephrol | 2 | 0.002 | 1.609 |
| Can J Urol | 11 | 0.021 | 1.571 |
| Clin Nephrol | 11 | 0.008 | 1.224 |
| Nephrol Ther | 4 | 0.007 | 0.792 |
| Prog Urol | 4 | 0.005 | 0.744 |
| Urologe A | 16 | 0.012 | 0.566 |
| Arch Esp Urol | 3 | 0.008 | 0.498 |
